# 1 **MVA-BN Vaccine Effectiveness: A Systematic Review of** 2 **Real-World Evidence in Outbreak Settings**

## 3 **Authors:**

4 Lauren M.K. Mason Ph.D.<sup>a</sup>, Estefania Betancur MSc<sup>a</sup>, Margarita Riera-Montes MD MSc<sup>a</sup>, Florian  
5 Lienert Ph.D.<sup>b</sup>, Suzanne Scheele MS<sup>c</sup>

## 6 **Affiliations:**

7 <sup>a</sup> P95 Epidemiology and Pharmacovigilance, Leuven, Belgium.

8 <sup>b</sup> Bavarian Nordic Switzerland AG, Zug, Switzerland

9 <sup>c</sup> Bavarian Nordic, Inc., Morrisville, North Carolina, United States of America.

10 **Corresponding author:** Florian Lienert; Bavarian Nordic Switzerland AG, Zug, Switzerland;  
11 [fli@bavarian-nordic.com](mailto:fli@bavarian-nordic.com)

## 12 **Abstract**

13 **Background:** Mpox is a disease endemic to Central and West Africa. It caused outbreaks in non-  
14 endemic countries, mainly in 2022. The endemic Democratic Republic of Congo is currently  
15 experiencing its largest outbreak yet. The vaccine Modified Vaccinia Ankara-Bavarian Nordic (MVA-  
16 BN) is approved for active immunization against mpox and smallpox. Since the outbreak in 2022, real-  
17 world studies have assessed MVA-BN's vaccine effectiveness (VE) against mpox, and this systematic  
18 literature review aims to summarize the most current evidence.

19 **Methods:** Medline (via PubMed), Embase, and LILACS were searched, as well as grey literature  
20 sources and publications' bibliographies to identify observational studies published between  
21 1/Jan/2022 and 28/Feb/2024 that estimate the VE of MVA-BN against symptomatic mpox or provide  
22 risk measures that allow calculation of these VE estimates. Data were presented descriptively in  
23 tables and text; the methodological quality of included records was assessed using an informal  
24 qualitative approach.

25 **Results:** The literature search identified a total of 16 records that fit the inclusion criteria. The studies  
26 took place in high-income countries and were heterogenous in design, setting, and definition of at-risk  
27 populations. MVA-BN VE estimates against symptomatic mpox infection  $\geq 14$  days post-vaccination  
28 were assessed. Where the study population was exclusively or primarily those receiving pre-exposure  
29 prophylactic vaccination, the adjusted VE estimates ranged from 35% to 86% (n=8 studies) for one  
30 dose and from 66% to 90% (n=5) for two doses. Where only post-exposure prophylactic vaccination  
31 was assessed, adjusted VE estimates were reported for one dose only at 78% and 89% (n=2).  
32 Additionally, MVA-BN reduced the risk of mpox-related hospitalization in one study and the severity of  
33 mpox clinical manifestations in two studies.

34 **Conclusions:** Despite heterogeneity in study design, setting, and at-risk populations, the reported VE  
35 estimates against symptomatic mpox infection for one or two doses of MVA-BN support deployment of  
36 MVA-BN for mpox outbreak control.

## 37 **Keywords**

38 mpox; post-exposure prophylactic vaccination; pre-exposure prophylactic vaccination; real-world  
39 evidence; systematic literature review; vaccine effectiveness

## 40 **Abbreviations**

41 CDC: US Centers for Disease Control and Prevention; CDESS: The Communicable Disease  
42 Electronic Surveillance System; CHS: Clalit Health Services; CI: confidence interval; DE: data  
43 extraction; DRC: Democratic Republic of Congo; FT: full-text review; GBMSM: gay, bisexual, and  
44 other men who have sex with men; HIV: human immunodeficiency virus; HRR: hazard rate ratio; IC,  
45 immunocompromised; IRR: incidence rate ratio; MeSH: medical subject headings; MPVX: monkeypox  
46 virus; MSM: men who have sex with men; MVA-BN: Modified Vaccinia Ankara-Bavarian Nordic; NR:  
47 not reported; NYC: New York City; OCM: other clinical manifestations; OR: odds ratio; PDE5:  
48 phosphodiesterase 5; PEP: post-exposure prophylactic vaccination; PrEP: pre-exposure prophylactic  
49 vaccination; PICOS: patient, intervention, comparison, outcome, setting; PRISMA: Preferred  
50 Reporting Items for Systematic Reviews and Meta-Analyses; RR: risk ratio; RWE: real-world  
51 evidence; SHC: sexual health clinic; SLR: systematic literature review; STI: sexually transmittable  
52 infection; SVI: social vulnerability index; VE: vaccine effectiveness.

## 53 Introduction

54 Mpox, formerly called monkeypox and first described in humans in the Democratic Republic of Congo  
55 (DRC) in 1970 [1], is an illness that was initially zoonotic and is caused by the monkeypox virus  
56 (MPXV). This DNA virus belongs to the *Orthopoxvirus* genus, which also includes the smallpox-  
57 causing variola virus [2]. The clinical presentation of mpox includes a distinctive, extensive rash, fever,  
58 headache, cough, asthenia, and lymphadenopathy. Additionally, complications such as coalescence  
59 of skin ulcers, bacterial skin infections, bronchopneumonia, and sepsis may occur [3]. MPXV is  
60 transmitted from animals to humans and between humans through contact with bodily fluids, lesions  
61 on the skin or mucosae, respiratory droplets, and contaminated objects [4]. A definitive animal  
62 reservoir host has not been identified [1].

63 Before the unprecedented global spread of the disease outside previously endemic countries in 2022,  
64 reports of mpox were almost exclusively limited to Central and West African countries [4]. An  
65 observed increase in cases in these countries before 2018 was hypothesized to be due to the  
66 cessation of routine smallpox vaccination leading to waning *Orthopoxvirus* immunity [1].

67 Starting in May 2022, a significant surge in mpox cases occurred in numerous non-endemic countries  
68 [5]. As of February 2024, over 94,000 confirmed mpox cases have been documented in 117 countries  
69 [6]. While previous occurrences of mpox in non-endemic regions were associated with international  
70 travel and importation of infected animals from West Africa [7], the 2022 outbreak was primarily  
71 characterized by human-to-human transmission of MPXV [8]. This outbreak mainly occurred among,  
72 but was not limited to, men who have sex with men (MSM) and in several high-income countries [9],  
73 which had not been reported previously. Other differences included a different clade type, lower  
74 mortality, and suggested novel epidemiological and clinical characteristics [9]. The outbreak response  
75 strategy consisted mainly of behavior change and vaccination of high-risk populations [2].

76 The DRC is currently experiencing its largest ever recorded mpox outbreak, with more than 12,000  
77 suspected cases and 500 deaths reported since the start of 2023 [10]. The outbreak is spreading to  
78 almost all provinces, with different transmission patterns and affected populations. Some areas are  
79 seeing large-scale transmission involving a larger proportion of children, potentially due to contact  
80 with rodents. The province of Equateur, with a population of almost 6 million, is experiencing large,  
81 concomitant mpox and measles outbreaks, with a potential increase in the risk of complications and a

82 larger reported mortality rate, as well as the risk of misdiagnosis of either disease. There is also a  
83 large outbreak of primarily sexually transmitted mpox infections among sex workers and adults in the  
84 mining city of Kamituga in South Kivu. The city's highly mobile population creates the risk for a multi-  
85 country outbreak as the area borders Rwanda, Burundi, and Tanzania [11]. Global outbreak response  
86 teams from multiple countries are active in the DRC, and mpox vaccination may soon become a tool  
87 in controlling the current crisis.

88 Modified Vaccinia Ankara-Bavarian Nordic (MVA-BN; trade names Jynneos/Imvanex/Imvamune) is  
89 the smallpox and mpox vaccine that has most broadly been used in response to the global mpox  
90 outbreak. MVA-BN cannot replicate in human cells and, unlike replicating smallpox vaccines, has a  
91 favorable safety profile for individuals with atopic dermatitis and immunodeficiency [12].

92 The MVA-BN vaccine can be administered prophylactically either before or after exposure to  
93 confirmed mpox cases. Pre-exposure prophylactic vaccination (PrEP) aims at protecting those at risk  
94 of mpox infections prior to having had contact with a confirmed case. Currently, the US Centers for  
95 Disease Control and Prevention (CDC) recommends PrEP for the at-risk groups: those at risk of  
96 occupational exposure, gay, bisexual, and other MSM (GBMSM) who have been diagnosed with  
97 certain sexually transmitted diseases and have multiple sexual partners, individuals engaging in  
98 sexual activities in areas with a high prevalence of mpox, and those with sexual partners meeting  
99 these criteria, as well as people with human immunodeficiency virus (HIV) infection or other causes of  
100 immunosuppression who have had recent or anticipate potential mpox exposure [13]. Post-exposure  
101 prophylactic vaccination (PEP) aims to prevent mpox or reduce its severity in individuals who have  
102 had contact with confirmed cases and can be administered up to 14 days post-exposure [13].

103 The regulatory authorities in the US, Canada, UK, and the EU approved MVA-BN in a two-dose  
104 schedule  $\geq 28$  days apart for active immunization against smallpox and mpox based on pre-clinical  
105 efficacy data from animal studies and clinical immunogenicity and safety studies [14-17]. The efficacy  
106 of MVA-BN against mpox has not been demonstrated in randomized controlled clinical trials; however,  
107 since the 2022 outbreak started, several real-world effectiveness studies have been conducted. This  
108 systematic literature review (SLR) aims to identify and summarize the most current real-world  
109 evidence (RWE) on the MVA-BN vaccine effectiveness (VE) against symptomatic mpox infection,  
110 mpox-related hospitalization, and severity of clinical mpox manifestations.

## 111 **Methods**

### 112 **Registration and protocol**

113 This SLR was registered prospectively in PROSPERO (<https://www.crd.york.ac.uk/prospero/>; number  
114 CRD42023441204), where key features from the protocol can be retrieved. The literature search was  
115 initially performed in 2023 and updated on February 28, 2024, to include the latest relevant literature.

116 The focus of this manuscript is on the summary of RWE of the VE of MVA-BN against mpox.

117 The protocol and manuscript for this SLR were developed in line with recommendations from the  
118 Preferred Reporting Items for Systematic Reviews and Meta-Analyses (PRISMA) statement and  
119 PRISMA extension for protocols (PRISMA-P) [18, 19].

### 120 **Search strategies and eligibility criteria**

121 The databases Medline (via PubMed), Embase, and LILACS were searched using database-specific  
122 keywords and medical subject headings (MeSH terms) related to mpox and vaccine  
123 effectiveness/vaccination. The detailed search strategies are available in **Supplementary Methods**.

124 We included peer-reviewed publications reporting on observational studies in humans on the VE of  
125 MVA-BN, published between January 1, 2022, and February 28, 2024 (date of last search) in English,  
126 Spanish, or French. We excluded publications that did not meet the inclusion criteria or where  
127 methods and sources for data collection and/or analysis were not clearly defined. Records reporting  
128 on *in vitro* studies, modeling studies, case reports/series, and (non-)randomized clinical trials were  
129 excluded. SLRs and meta-analyses (MAs) were retained through the search and first selection stage  
130 to allow screening through the bibliographies for identification of additional relevant publications, but  
131 SLRs and MAs were not retained for data extraction. The full list of eligibility criteria is available in  
132 **Supplementary Methods**.

133 To identify additional relevant publications, grey literature sources and pre-print databases were  
134 searched on March 5, 2024 (date of last search) using source-specific search terms and limits as  
135 detailed in **Supplementary Methods**.

### 136 **Record selection**

137 After deduplicating identified records, two independent researchers (EB, LM) screened the titles and  
138 abstracts of all records in duplicate. Results were compared and discrepancies were discussed; in

139 case of doubt, the record was included for full-text review. Records for which insufficient information  
140 was available in the title and abstract were also included for full-text review. All full texts were  
141 reviewed by one researcher (EB), and full texts for 10% of the records were screened in duplicate  
142 (EB, LM). The results were compared and discrepancies were discussed; any doubts outside the 10%  
143 were also discussed. When multiple articles reported on the same dataset and the same outcome,  
144 only the most recent and complete available version was included. To identify additional relevant  
145 publications, bibliographies of selected papers (e.g., key studies, SLRs, and MAs) were manually  
146 searched.

### 147 **Data collection and synthesis**

148 One reviewer (EB) extracted all relevant data for each retained record in a pre-defined template in  
149 Microsoft Excel. The main outcomes of interest were crude and/or adjusted VE estimates against  
150 symptomatic mpox infection, mpox-related hospitalization, and severity of mpox clinical  
151 manifestations with crude/adjusted confidence intervals (CIs). Data related to these VE estimates,  
152 such as VE calculation methods, subpopulations, stratification groups, incidence rates, cumulative  
153 hazard rates, risk association measures (odds ratios [ORs], risk ratios [RRs], hazard ratios [HRs],  
154 incidence rate ratios [IRR], hazard rate ratios [HRRs]), and confounders were also extracted. In case  
155 no crude or adjusted VE estimates were reported in the publication, we calculated the VE and 95%  
156 CIs from extracted risk association measures using the following formula:

$$VE = 1 - \frac{\text{Risk among vaccinated group}}{\text{Risk among unvaccinated group}} \times 100$$

157 No other calculations or assumptions were made in case of other missing data. Variables related to  
158 study characteristics (e.g., study design, vaccination strategy), population characteristics (e.g.,  
159 sample definitions, comorbidities), study methods (e.g., case and control definitions), additional  
160 information on statistical analyses (e.g., results of the sensitivity analysis), and data for assessment of  
161 the study's methodological quality (e.g., strengths and limitations as mentioned by the authors) were  
162 also extracted.

163 Study characteristics and the collected VE estimates were presented descriptively in tables and text.  
164 VE estimates were reported stratified by type of vaccination strategy: PrEP or PEP. For the former, we  
165 reported studies including exclusively PrEP recipients together with studies designed primarily to

166 evaluate PrEP, but that may have inadvertently included some PEP subjects (designated 'PrEP ±  
167 PEP'). Due to the heterogeneity of the data, no statistical synthesis of the extracted data was  
168 performed.

### 169 **Risk of bias assessment**

170 The methodological quality of all records included in the final review was assessed by three  
171 researchers (EB, LM, MRM) using an informal qualitative approach based on the expertise of  
172 reviewers and published commentaries, as well as the limitations described by the authors  
173 themselves. Potential biases of the studies were identified and how these might impact the results  
174 and conclusions of the studies was considered and discussed.

## 175 **Results**

### 176 **Study selection and characteristics**

177 The literature search identified 904 unique records from databases, of which 106 were retained for  
178 full-text review and eight were included in the final review. Nine additional records were identified from  
179 other sources, of which eight were included in the final review. Hence, a total of 16 records on 16  
180 unique studies were identified that reported on the VE of MVA-BN against symptomatic mpox infection  
181 or provided risk measures that allow calculation of VE estimates (**Figure 1**).

182 The main characteristics of the included studies are summarized in **Table 1**. The studies took place in  
183 six countries, with the majority conducted in the United States (n=7) [20-26], followed by Canada  
184 (n=3) [27-29], Spain (n=2) [30, 31], the United Kingdom (n=2) [32, 33], and one each in Israel [34] and  
185 the Netherlands [35]. The studies used various designs to assess effectiveness of MVA-BN, with a  
186 retrospective cohort design being used most frequently (n=6) [23, 24, 26, 27, 30, 34], followed by a  
187 case-coverage design (n=4) [22, 32, 33, 35], a case-control design (n=4; incl. one test-negative case-  
188 control design [28]) [20, 21, 25, 28], and a prospective cohort design (n=2) [29, 31]. The studies used  
189 linked data from public health surveillance systems [20, 22-30, 32, 33], from public health institutions  
190 [23, 31, 35], and/or from healthcare systems [21, 34]. The number of mpox cases included for  
191 calculation of the VE against symptomatic mpox infection ranged from 137 to 11,320. Control groups  
192 were defined in various ways across study designs and included MSM, incident HIV cases, males  
193 with sexually transmitted infections (STIs), symptomatic individuals who tested negative for mpox, and  
194 individuals in contact with mpox cases. The study period covered (part of) 2022 in 11 studies [21-25,



195 28, 30-32, 34, 35], (part of) 2022 and part of 2023 in four studies [20, 26, 27, 29], and the whole of  
196 2023 in one study [33]. Fourteen studies focused on the use of MVA-BN as PrEP, of which six  
197 included PrEP recipients only [21, 28-30, 32, 33] and eight may have included a proportion of PEP  
198 recipients due to the available data not allowing exclusion of all PEP recipients (PrEP  $\pm$  PEP) [20, 22,  
199 23, 25-27, 34, 35]; the remaining two studies focused on the use of MVA-BN as PEP [24, 31]. The  
200 effectiveness of MVA-BN against mpox was evaluated using ORs (n=10) [20, 21, 24-28, 32, 33, 35],  
201 HRs (n=4) [23, 29, 31, 34], RRs (n=1) [30], or IRRs (n=1) [22] (**Table 1**).

## 202 **Risk of bias**

203 The risk of bias assessment found sources of (residual) confounding in several studies, with the most  
204 important ones resulting from the overall population setting and/or the selection of  
205 controls/comparator groups [21, 23-28, 31-34]. Sources of bias inherent to study design were also  
206 identified, including misclassification bias for studies using data from registries and databases [24, 25,  
207 33], recall bias and non-response bias for studies using surveys and self-reported data [20, 24, 27,  
208 28, 32], and an inability to control for confounders in case-coverage studies [22, 32, 33, 35].  
209 Additionally, one study was found to be at risk of immortal time bias [31].

## 210 **Study results**

### 211 ***Vaccine effectiveness estimates against symptomatic mpox infection for PrEP with MVA-BN***

212 Twelve studies reported that PrEP with MVA-BN reduced the risk of symptomatic mpox infection at  
213  $\geq 14$  days after vaccination. Half of the studies reported data for PrEP recipients only, while the other  
214 half may have included a proportion of PEP recipients (PrEP  $\pm$  PEP). Five studies reported data for  
215 one dose of MVA-BN only, one study reported data for two doses only, and six studies reported data  
216 for both one and two doses (**Table 2**).

217 For one dose of MVA-BN administered as PrEP, adjusted VE estimates between 35% and 86% were  
218 reported across eight studies. Seven studies reported crude VE estimates, which fell within the same  
219 range (33%–84%). The studies conducted by Brousseau et al. [28] and Deputy et al. [21] reported  
220 adjusted VE estimates for one dose of MVA-BN of 35% and 36%, respectively, which were notably  
221 lower than the adjusted VE estimates reported in the other studies ( $\geq 59\%$ ) (**Table 2**).

222 For two doses of MVA-BN administered as PrEP, five studies reported adjusted VE estimates ranging  
223 from 66% to 90%. The reported crude VE estimates ranged from 57% to 87% in five studies (**Table**

224 2). The study by Charles et al. [33] was the only study to use data collected in the year 2023 (Jan  
225 2023 until Dec 2023) only, and found crude VE estimates of 84% for one dose and 80% for two doses  
226 of MVA-BN (adjusted VE estimates were not reported) (**Table 2**).

### 227 ***Vaccine effectiveness estimates against symptomatic mpox infection for PEP with MVA-BN***

228 Two studies reported on the effectiveness of one dose of PEP with MVA-BN against symptomatic  
229 mpox infection at  $\geq 14$  days after vaccination; no data were reported for two doses of PEP (**Table 3**).

230 The two studies found adjusted VE estimates of 78% and 89% when ‘classic statistical methods’  
231 (multivariate logistic regression and survival analysis, respectively) were used. Rosen et al. [24] also  
232 calculated VE estimates using target trial emulation to account for immortal time bias, which were -7%  
233 for PEP administered  $\leq 14$  days after first exposure and 19% for PEP administered  $\leq 14$  days after last  
234 exposure; these VE estimates were associated with wide CIs due to small sample sizes (**Table 3**).

### 235 ***Vaccine effectiveness estimates of MVA-BN against mpox-related hospitalization and severity*** 236 ***of mpox clinical manifestations***

237 The study by Schildhauer et al. [26] reported a lower risk of mpox-related hospitalization among those  
238 who had been vaccinated with MVA-BN compared to those who had not been vaccinated. Based on  
239 ORs provided by Schildhauer et al., we calculated crude VE estimates against hospitalization of 73%  
240 and 80% for a vaccination schedule consisting of one or two MVA-BN doses, respectively, and 58%  
241 for one dose of MVA-BN administered as PEP  $< 14$  days before the episode date (**Table 4**).

242 Two papers reported a decreased severity of mpox clinical manifestations in cases who had received  
243 one dose of MVA-BN. Allard et al. [27] found adjusted VE estimates at day 1 of infection of 60%  
244 against the number of skin lesions, 76% against the number of body sites affected by skin lesions,  
245 and 59% against other clinical manifestations (incl. fever, muscle pain, and headache). Montero  
246 Morales et al. [31] reported adjusted VE estimates of one dose of MVA-BN administered as PEP of  
247 72% against general symptoms (fever, asthenia, odynophagia, muscle pain, headache, or other  
248 symptoms) and 86% against polysymptomatic disease (i.e., occurrence of four or more general  
249 symptoms) (**Table 4**).

250 ***Vaccine effectiveness estimates of MVA-BN against symptomatic mpox infection by route of***  
251 ***administration***

252 Two studies reported data stratified by route of administration; one reported VE estimates while the  
253 other study only reported the number of mpox cases in vaccinated and unvaccinated groups  
254 (**Supplementary Table 1**). When adjusted VE estimates against symptomatic mpox infection were  
255 reported, these were in similar ranges for two doses of MVA-BN regardless of the route of  
256 administration: 80% (95% CI 23–95) for intradermal administration, 89% (95% CI 56–97) for  
257 subcutaneous administration, and 87% (95% CI 69–95) when administered via a combination of both  
258 routes (**Supplementary Table 1**).

259 ***Vaccine effectiveness estimates of MVA-BN against symptomatic mpox infection <14 days***  
260 ***after vaccination***

261 Four studies reported VE estimates stratified by time after vaccination, and as such demonstrated the  
262 risk of breakthrough infections before the onset of vaccine-induced immunity (**Supplementary Table**  
263 **2**). Within the first 13 days post-vaccination, reported VE estimates for MVA-BN PrEP or ‘PrEP ± PEP’  
264 did not exceed -4% (95% CI -50–29) (**Supplementary Table 2**).

265 **Discussion**

266 This SLR identified 16 records on real-world studies assessing the VE of one or two doses of MVA-BN  
267 against symptomatic mpox infection, mpox-related hospitalization, and severity of mpox clinical  
268 manifestations. When MVA-BN was administered as PrEP, the adjusted VE estimates against  
269 symptomatic mpox infection  $\geq 14$  days post-vaccination were  $\geq 35\%$  (n=8 studies) for one dose and  
270  $\geq 66\%$  (n=5) for two doses. The lower limit of the VE range for one dose of MVA-BN administered as  
271 PrEP was lower than that of other ranges because two studies reported VE estimates that were  
272 notably lower than other estimates [21, 28]. Outside of these data points, the adjusted VE estimates  
273 for PrEP with one dose of MVA-BN were  $\geq 59\%$ . Adjusted VE estimates against symptomatic mpox  
274 infection for MVA-BN administered as PEP were only reported for one dose and were  $\geq 78\%$  (n=2  
275 studies). The VE estimates for two doses of MVA-BN fell in a similar range as VE estimates  
276 historically reported for replicating vaccinia-based smallpox vaccines [36]. Furthermore, MVA-BN  
277 vaccination reduced the risk of mpox-related hospitalization and the severity of mpox clinical  
278 manifestations.

279 In most studies, controls or unvaccinated comparator groups were selected based on characteristics  
280 such as MSM or transgender status, recent diagnosis of HIV or other STIs, and/or use of HIV pre-  
281 exposure prophylaxis. However, there was notable heterogeneity across studies in the definition of  
282 the at-risk population, which might have influenced the VE estimates. In the case-control study by  
283 Deputy et al. [21] for example, which found an adjusted VE estimate against symptomatic mpox  
284 infection of 36% for one dose of MVA-BN administered as PrEP and was one of the notably low VE  
285 estimates, controls were identified from a large secondary database that may not have had as  
286 granular information on risk proxies as studies using individual patient-level data. The control  
287 population was not restricted to MSM, resulting in a broader at-risk population than in other studies,  
288 which may have led to the inclusion of a higher proportion of subjects who were not vaccine-eligible in  
289 the control group and to the underestimation of the VE. This concern was also highlighted in a letter to  
290 the editor related to this article [37, 38]. The authors of this letter to the editor highlighted that the  
291 vaccine uptake of one dose of MVA-BN among controls reported by Deputy et al. (14.5%) was lower  
292 than vaccine uptake data reported by e.g., the CDC. When they recalculated VE estimates against  
293 symptomatic mpox infection using a vaccine uptake of 45.5% (i.e., uptake reported by CDC for the  
294 period until October 1, 2022 [22]), the crude VE estimate increased to fall within a similar range as VE  
295 estimates reported by other studies [22, 32, 34]. A very different approach regarding the included at-  
296 risk population was taken in the case-control study by Rosenberg et al. [25], where controls were  
297 restricted to MSM who had rectal gonorrhea or primary syphilis diagnosed within the same time frame  
298 as the mpox cases. This approach was assumed to lead to a control population that exhibited risk  
299 behavior similar to the cases within the same time period. A sensitivity analysis within that study  
300 included secondary syphilis cases in the control group and found a VE estimate for one or two MVA-  
301 BN doses against symptomatic mpox infection that trended lower than the main VE estimate, albeit  
302 with overlapping CIs (64.8% [95% CI 26.7–83.1] and 75.7% [95% CI 48.5–88.5], respectively). This  
303 difference may reflect the inclusion of control patients with more remote risk behaviors or different  
304 clinical presentations [25]. As a last example, the test-negative case-control study by Brousseau et al.  
305 [28] found a VE estimate against symptomatic mpox infection for one MVA-BN dose of 35% based on  
306 data in administrative databases only, with adjustment for surrogate indicators of exposure risk  
307 available in these databases. However, when the authors adjusted for self-reported risk factors, which  
308 were higher in number and more detailed than those available in the administrative databases, the VE

309 estimate increased to 65% (with a wide CI) [28]. Though the sample size in this study was small,  
310 particularly for the sub-analysis (n=199 cases), the study design highlights the potential impact of  
311 confounding based on differential risk exposure by vaccination status.

312 Licensure of MVA-BN for protection against mpox was based on the efficacy of two MVA-BN doses  
313 against mpox observed in animal studies [39] and clinical safety and immunogenicity data. The latter  
314 includes the demonstration of non-inferior immunogenicity compared to the replicating-vaccinia  
315 vaccine ACAM2000 together with a more favorable safety profile for MVA-BN compared to  
316 ACAM2000 as demonstrated in a pivotal phase 3 randomized clinical trial [40]. While one dose of  
317 MVA-BN was previously shown to induce low titers of vaccinia-specific and MPVX-specific  
318 neutralizing antibody titers [41-43], our SLR found VE estimates against symptomatic infections for  
319 one dose of MVA-BN suggestive of high effectiveness. This challenges the view that neutralizing  
320 antibody levels correlate with protection against *Orthopoxvirus* infection. Indeed, previous  
321 experiments showed that MVA vaccination fully protected B cell-deficient mice in *Orthopoxvirus*  
322 challenge models, indicating that antibodies are not the sole correlate of protection [44]. Furthermore,  
323 a study including a small number of MVA-BN vaccinated individuals revealed that the protective  
324 immunogenicity of MVA-BN might be mostly mediated by T cells [45]. While a correlate of immunity for  
325 MVA-BN has not been established yet, these findings suggest that cellular immunity could be  
326 relevant. However, a pre-clinical animal study for an mRNA mpox vaccine candidate found that  
327 protection was primarily conferred by inducing a focused humoral immune response [46], which  
328 suggests that the correlate of immunity might depend on the vaccine platform.

329 This SLR employed a thorough process searching three literature databases combined with grey  
330 literature sources including preprints and a search through bibliographies of selected papers.  
331 Nevertheless, the presented data need to be interpreted in light of the high heterogeneity across  
332 included studies in terms of study design, characteristics of study populations, and study settings,  
333 among others, which limits comparisons. Because we considered that this heterogeneity across  
334 studies would hamper the interpretation of VE point estimates originating from MAs, we chose not to  
335 perform such analysis. This SLR also highlighted gaps in data. Most participants included in the  
336 identified studies were adult MSM, and data on females and children are lacking. The use of very  
337 specific at-risk groups reduced the generalizability of some studies. All identified studies took place in  
338 high-income countries, while no data from mpox-endemic countries were identified. Furthermore,

339 several research groups initiated prospective studies in high-income countries in the early phases of  
340 the mpox outbreak, but these have not (yet) been finalized and/or published, primarily because of a  
341 waning number of cases. Most of these studies have now been suspended due to a lack of cases.  
342 Lastly, while we identified studies that demonstrated the risk of breakthrough infections within 14 days  
343 of vaccination, data on VE durability in real-world settings was limited. Only the study by Charles et al.  
344 from the UK provided some insight by reporting crude VE estimates against symptomatic infections of  
345 84% and 80% for one and two doses of MVA-BN, respectively, based on confirmed and highly  
346 probable mpox diagnoses reported until December 2023, while most vaccines had been administered  
347 by March 2023 [33]. It should, however, be noted that follow-up time might impact VE estimates as a  
348 large proportion of those vaccinated will receive the vaccine during the early stages of its availability  
349 during an outbreak. Also, a larger proportion of those at greatest risk of infection are also likely to be  
350 infected earlier in the outbreak when awareness and vaccination coverage are lower. Therefore, a  
351 longer duration of follow-up may bias toward vaccine effect as overall case rates decline over time.

352 The included studies themselves also had limitations. A common limitation was that, due to the timing  
353 of the vaccination program within the mpox outbreak, limited numbers of cases were available for  
354 inclusion, especially after deployment of the second MVA-BN dose. This limited the studies in terms of  
355 power and the types of analyses that they could perform. However, all of the included studies were  
356 adequately powered for primary VE analyses. Furthermore, the studies were inconsistent in how they  
357 defined the use of MVA-BN as PEP and whether studies that focused on PrEP included or excluded  
358 PEP use in their analyses. The inclusion of a proportion of PEP recipients was unavoidable in some  
359 studies because of the data used for the analyses. In Germany, only 7% of all MVA-BN  
360 administrations from June 2022 to January 2024 were PEP [47]. Because the studies included in our  
361 SLR used mpox vaccination recommendations similar to those in place in Germany, it is likely that the  
362 majority of vaccine recipients included in 'PrEP ± PEP' studies received MVA-BN as PrEP. Lastly, all  
363 studies were found to be at risk of some (residual) confounding and other sources of bias. Many  
364 studies relied on data from databases, and exposure risk was defined based on proxies such as MSM  
365 or transgender status, recent diagnosis of HIV or other STIs, and/or use of HIV pre-exposure  
366 prophylaxis because individual-level behavior data were not available; however, this limited the  
367 researchers' ability to account for confounding. Health-seeking behavior, HIV status, geographic  
368 location, socioeconomic status, race and gender identity are examples of other confounders which

369 were not considered or accounted for by some studies. Studies that actively recruited participants  
370 could obtain more detailed data on exposure risk but were also subject to bias based on factors  
371 related to willingness to participate as well as recall bias. A test-negative case-control design, which  
372 might help reduce selection bias and avoid confounding associated with health-seeking behavior  
373 because cases and controls arise from the same source population, was employed in only one study  
374 [28]. Concern was raised in a letter to the editor that immortal time bias and confounding might have  
375 overestimated the adjusted VE of one dose of MVA-BN administered as PEP estimated by Montero  
376 Morales et al. (89% [95% CI 76–95]) [31, 48]. In their response letter, Montero Morales et al.  
377 performed an intent-to-treat analysis and found a VE of 75% (95% CI 55–86). Additionally, they  
378 performed a landmark approach analysis to try and account for immortal time bias by including  
379 vaccination as a time-varying exposure, which resulted in an estimated VE of 83% (95% CI 61–92)  
380 [49]. The importance of being mindful of immortal time bias was also demonstrated by the target trial  
381 emulation conducted by Rosen et al. [24], which lowered their adjusted VE estimates against  
382 symptomatic infections for PEP administered  $\leq 14$  days after last exposure from 78% (95% CI 50–91)  
383 to 19% (95% CI -54–57). Regardless of these limitations and the heterogeneity in study design and  
384 methods across the included studies, the VE estimates of MVA-BN against symptomatic mpox  
385 infection were generally high and in similar ranges. Taken together, the available real-world VE data  
386 support the use of MVA-BN in managing active outbreaks.

387 Future VE studies may be conducted if new outbreaks continue to expand. Ideally, investigators would  
388 prioritize maximizing comparability in risk of exposure/infection over time in the vaccinated and  
389 unvaccinated and in cases and controls in order to generate a more precise estimate of the true  
390 effectiveness of MVA-BN against mpox.

## 391 **Conclusions**

392 Despite heterogeneity in study design, study settings, and at-risk populations across the 16 included  
393 studies, this SLR demonstrated the effectiveness of one or two doses of MVA-BN against  
394 symptomatic mpox infection in outbreak settings. As such, the presented data support the deployment  
395 of MVA-BN for mpox outbreak control. The identified methodological limitations and biases  
396 underscore the need for improved study designs to allow more accurate evaluation and more precise  
397 estimation of the true effectiveness of MVA-BN against mpox.

398 **Additional information**

399 **Acknowledgments**

400 The authors thank Lotte Mathé (P95) for medical writing support.

401 **Author contributions**

402 FL: Conceptualization; Writing – review and editing

403 SS: Conceptualization; Writing – review and editing

404 EB: Investigation; Writing – original draft; Writing – review and editing

405 LM: Investigation; Writing – original draft; Writing – review and editing

406 MRM: Conceptualization; Supervision; Writing – review and editing

407 **Availability of data**

408 Other: All data used in this study originated from published sources.

409 **Conflicts of interest**

410 FL and SS are employees of Bavarian Nordic. The study-related activities of P95 employees EB, LM,  
411 and MRM were funded by Bavarian Nordic. All authors attest that they meet the ICMJE criteria for  
412 authorship.

413 **Funding source**

414 The research presented in this manuscript and manuscript development were funded by Bavarian  
415 Nordic Inc.



## 416 References

- 417 1. Petersen, B.W., et al., *Vaccinating against monkeypox in the Democratic Republic of the*  
418 *Congo*. *Antiviral Res*, 2019. **162**: p. 171-177. <https://doi.org/10.1016/j.antiviral.2018.11.004>
- 419 2. Huang, Y., Mu, L., and Wang, W., *Monkeypox: epidemiology, pathogenesis, treatment and*  
420 *prevention*. *Signal Transduct Target Ther*, 2022. **7**(1): p. 373. [https://doi.org/10.1038/s41392-](https://doi.org/10.1038/s41392-022-01215-4)  
421 [022-01215-4](https://doi.org/10.1038/s41392-022-01215-4)
- 422 3. Sharma, A., et al., *Monkeypox epidemiology, clinical presentation, and transmission: a*  
423 *systematic review*. *Int J Emerg Med*, 2023. **16**(1): p. 20. [https://doi.org/10.1186/s12245-023-](https://doi.org/10.1186/s12245-023-00491-3)  
424 [00491-3](https://doi.org/10.1186/s12245-023-00491-3)
- 425 4. Durski, K.N., et al., *Emergence of Monkeypox - West and Central Africa, 1970-2017*. *MMWR*  
426 *Morb Mortal Wkly Rep*, 2018. **67**(10): p. 306-310. <https://doi.org/10.15585/mmwr.mm6710a5>
- 427 5. Thornhill, J.P., et al., *Monkeypox Virus Infection in Humans across 16 Countries - April-June*  
428 *2022*. *N Engl J Med*, 2022. **387**(8): p. 679-691. <https://doi.org/10.1056/NEJMoa2207323>
- 429 6. World Health Organization. *2022-23 Mpox Outbreak: Global Trends*. 2023 [cited 2024 Mar  
430 22]; Available from: [https://worldhealthorg.shinyapps.io/mpox\\_global/](https://worldhealthorg.shinyapps.io/mpox_global/).
- 431 7. Reed, K.D., et al., *The detection of monkeypox in humans in the Western Hemisphere*. *N*  
432 *Engl J Med*, 2004. **350**(4): p. 342-50. <https://doi.org/10.1056/NEJMoa032299>
- 433 8. Perez Duque, M., et al., *Ongoing monkeypox virus outbreak, Portugal, 29 April to 23 May*  
434 *2022*. *Euro Surveill*, 2022. **27**(22). <https://doi.org/10.2807/1560-7917.ES.2022.27.22.2200424>
- 435 9. Mitja, O., et al., *Monkeypox*. *Lancet*, 2023. **401**(10370): p. 60-74.  
436 [https://doi.org/10.1016/S0140-6736\(22\)02075-X](https://doi.org/10.1016/S0140-6736(22)02075-X)
- 437 10. Centers for Disease Control and Prevention. *2023 Outbreak in Democratic Republic of*  
438 *Congo*. 2024 [cited 2024 Mar 25]; Available from:  
439 <https://www.cdc.gov/poxvirus/mpox/outbreak/2023-drc.html>.
- 440 11. World Health Organization. *Disease Outbreak News; Mpox (monkeypox) in the Democratic*  
441 *Republic of the Congo*. 2023 [cited 2024 Apr 4]; Available from:  
442 <https://www.who.int/emergencies/disease-outbreak-news/item/2023-DON493>.
- 443 12. Volkmann, A., et al., *The Brighton Collaboration standardized template for collection of key*  
444 *information for risk/benefit assessment of a Modified Vaccinia Ankara (MVA) vaccine platform*.  
445 *Vaccine*, 2021. **39**(22): p. 3067-3080. <https://doi.org/10.1016/j.vaccine.2020.08.050>

- 446 13. Centers for Disease Control and Prevention. *Mpox - Vaccination*. 2023 [cited 2024 Mar 22];  
447 Available from: <https://www.cdc.gov/poxvirus/mpox/interim-considerations/overview.html>.
- 448 14. European Medicines Agency. *Imvanex*. 2023 [cited 2024 Mar 22]; Available from:  
449 <https://www.ema.europa.eu/en/medicines/human/EPAR/imvanex>.
- 450 15. Government of Canada. *Smallpox and mpox (monkeypox) vaccines: Canadian Immunization*  
451 *Guide*. 2023 [cited 2024 Mar 22]; Available from: [https://www.canada.ca/en/public-](https://www.canada.ca/en/public-health/services/publications/healthy-living/canadian-immunization-guide-part-4-active-vaccines/page-21-smallpox-vaccine.html)  
452 [health/services/publications/healthy-living/canadian-immunization-guide-part-4-active-](https://www.canada.ca/en/public-health/services/publications/healthy-living/canadian-immunization-guide-part-4-active-vaccines/page-21-smallpox-vaccine.html)  
453 [vaccines/page-21-smallpox-vaccine.html](https://www.canada.ca/en/public-health/services/publications/healthy-living/canadian-immunization-guide-part-4-active-vaccines/page-21-smallpox-vaccine.html).
- 454 16. UK Health Security Agency. *Guidance - Protecting you from mpox (monkeypox): information*  
455 *on the smallpox vaccination*. 2022 [cited 2024 Mar 22]; Available from:  
456 [https://www.gov.uk/government/publications/monkeypox-vaccination-resources/protecting-](https://www.gov.uk/government/publications/monkeypox-vaccination-resources/protecting-you-from-monkeypox-information-on-the-smallpox-vaccination)  
457 [you-from-monkeypox-information-on-the-smallpox-vaccination](https://www.gov.uk/government/publications/monkeypox-vaccination-resources/protecting-you-from-monkeypox-information-on-the-smallpox-vaccination).
- 458 17. U.S. Food & Drug Administration. *Jynneos*. 2023 [cited 2024 Mar 22]; Available from:  
459 <https://www.fda.gov/vaccines-blood-biologics/jynneos>.
- 460 18. Page, M.J., et al., *The PRISMA 2020 statement: an updated guideline for reporting*  
461 *systematic reviews*. *BMJ*, 2021. **372**: p. n71. <https://doi.org/10.1136/bmj.n71>
- 462 19. Moher, D., et al., *Preferred reporting items for systematic review and meta-analysis protocols*  
463 *(PRISMA-P) 2015 statement*. *Syst Rev*, 2015. **4**(1): p. 1. [https://doi.org/10.1186/2046-4053-4-](https://doi.org/10.1186/2046-4053-4-1)  
464 [1](https://doi.org/10.1186/2046-4053-4-1)
- 465 20. Dalton, A.F., et al., *Estimated Effectiveness of JYNNEOS Vaccine in Preventing Mpox: A*  
466 *Multijurisdictional Case-Control Study - United States, August 19, 2022-March 31, 2023*.  
467 *MMWR Morb Mortal Wkly Rep*, 2023. **72**(20): p. 553-558.  
468 <https://doi.org/10.15585/mmwr.mm7220a3>
- 469 21. Deputy, N.P., et al., *Vaccine Effectiveness of JYNNEOS against Mpox Disease in the United*  
470 *States*. *N Engl J Med*, 2023. **388**(26): p. 2434-2443. <https://doi.org/10.1056/NEJMoa2215201>
- 471 22. Payne, A.B., et al., *Reduced Risk for Mpox After Receipt of 1 or 2 Doses of JYNNEOS*  
472 *Vaccine Compared with Risk Among Unvaccinated Persons - 43 U.S. Jurisdictions, July 31-*  
473 *October 1, 2022*. *MMWR Morb Mortal Wkly Rep*, 2022. **71**(49): p. 1560-1564.  
474 <https://doi.org/10.15585/mmwr.mm7149a5>

- 475 23. Ramchandani, M.S., et al., *Effectiveness of the Modified Vaccinia Ankara Vaccine Against*  
476 *Mpox in Men Who Have Sex With Men: A Retrospective Cohort Analysis, Seattle,*  
477 *Washington.* Open Forum Infect Dis, 2023. **10**(11): p. ofad528.  
478 <https://doi.org/10.1093/ofid/ofad528>
- 479 24. Rosen, J.B., et al., *JYNNEOS effectiveness as post-exposure prophylaxis against mpox:*  
480 *Challenges using real-world outbreak data.* Vaccine, 2024. **42**(3): p. 548-555.  
481 <https://doi.org/10.1016/j.vaccine.2023.12.066>
- 482 25. Rosenberg, E.S., et al., *Effectiveness of JYNNEOS Vaccine Against Diagnosed Mpox*  
483 *Infection - New York, 2022.* MMWR Morb Mortal Wkly Rep, 2023. **72**(20): p. 559-563.  
484 <https://doi.org/10.15585/mmwr.mm7220a4>
- 485 26. Schildhauer, S., et al., *Reduced Odds of Mpox-Associated Hospitalization Among Persons*  
486 *Who Received JYNNEOS Vaccine - California, May 2022-May 2023.* MMWR Morb Mortal  
487 Wkly Rep, 2023. **72**(36): p. 992-996. <https://doi.org/10.15585/mmwr.mm7236a4>
- 488 27. Allard, R., et al., *Breakthrough cases of mpox: One-dose vaccination is associated with milder*  
489 *clinical manifestations.* J Infect Public Health, 2024. **17**(4): p. 676-680.  
490 <https://doi.org/10.1016/j.jiph.2024.02.015>
- 491 28. Brousseau, N., et al., *Single-dose Effectiveness of Mpox Vaccine in Quebec, Canada: Test-*  
492 *negative Design With and Without Adjustment for Self-reported Exposure Risk.* Clin Infect Dis,  
493 2024. **78**(2): p. 461-469. <https://doi.org/10.1093/cid/ciad584>
- 494 29. Navarro, C., et al., *Effectiveness of one dose of MVA-BN vaccine against mpox infection in*  
495 *males in Ontario, Canada: A target trial emulation.* 2023.  
496 <https://doi.org/doi:10.1101/2023.10.04.23296566>
- 497 30. Fontan-Vela, M., et al., *Effectiveness of Modified Vaccinia Ankara-Bavaria Nordic Vaccination*  
498 *in a Population at High Risk of Mpox: A Spanish Cohort Study.* Clin Infect Dis, 2024. **78**(2): p.  
499 476-483. <https://doi.org/10.1093/cid/ciad645>
- 500 31. Montero Morales, L., et al., *Post-exposure vaccine effectiveness and contact management in*  
501 *the mpox outbreak, Madrid, Spain, May to August 2022.* Euro Surveill, 2023. **28**(24).  
502 <https://doi.org/10.2807/1560-7917.ES.2023.28.24.2200883>

- 503 32. Bertran, M., et al., *Effectiveness of one dose of MVA-BN smallpox vaccine against mpox in*  
504 *England using the case-coverage method: an observational study.* Lancet Infect Dis, 2023.  
505 **23**(7): p. 828-835. [https://doi.org/10.1016/S1473-3099\(23\)00057-9](https://doi.org/10.1016/S1473-3099(23)00057-9)
- 506 33. Charles, H., et al., *Post-peak mpox in England: epidemiology, reinfection, and vaccine*  
507 *effectiveness – data from 2023.* medRxiv, 2024: p. 2024.02.26.24303362.  
508 <https://doi.org/10.1101/2024.02.26.24303362>
- 509 34. Wolff Sagy, Y., et al., *Real-world effectiveness of a single dose of mpox vaccine in males.* Nat  
510 Med, 2023. **29**(3): p. 748-752. <https://doi.org/10.1038/s41591-023-02229-3>
- 511 35. Haverkate, M.R., et al., *Factors that influenced the course of the mpox outbreak in the*  
512 *Netherlands, 2022-2023.* medRxiv, 2023: p. 2023.10.09.23296426.  
513 <https://doi.org/10.1101/2023.10.09.23296426>
- 514 36. Fine, P.E., et al., *The transmission potential of monkeypox virus in human populations.* Int J  
515 Epidemiol, 1988. **17**(3): p. 643-50. <https://doi.org/10.1093/ije/17.3.643>
- 516 37. Arbel, R., Zucker, R., and Wolff-Sagy, Y., *Vaccine Effectiveness against Mpox in the United*  
517 *States - Letter to the Editor.* N Engl J Med, 2023. **389**(15): p. 1440.  
518 <https://doi.org/10.1056/NEJMc2309583>
- 519 38. Deputy, N.P.G., J.L., *Vaccine Effectiveness against Mpox in the United States - Author's reply.*  
520 New England Journal of Medicine, 2023. **389**(15): p. 1440-1441. [https://doi.org/DOI:](https://doi.org/DOI:10.1056/NEJMc2309583)  
521 [10.1056/NEJMc2309583](https://doi.org/DOI:10.1056/NEJMc2309583)
- 522 39. Hatch, G.J., et al., *Assessment of the protective effect of Imvamune and Acam2000 vaccines*  
523 *against aerosolized monkeypox virus in cynomolgus macaques.* J Virol, 2013. **87**(14): p.  
524 7805-15. <https://doi.org/10.1128/JVI.03481-12>
- 525 40. Pittman, P.R., et al., *Phase 3 Efficacy Trial of Modified Vaccinia Ankara as a Vaccine against*  
526 *Smallpox.* N Engl J Med, 2019. **381**(20): p. 1897-1908.  
527 <https://doi.org/10.1056/NEJMoa1817307>
- 528 41. Ilchmann, H., et al., *One- and Two-Dose Vaccinations With Modified Vaccinia Ankara-*  
529 *Bavarian Nordic Induce Durable B-Cell Memory Responses Comparable to Replicating*  
530 *Smallpox Vaccines.* J Infect Dis, 2023. **227**(10): p. 1203-1213.  
531 <https://doi.org/10.1093/infdis/jiac455>

- 532 42. Hubert, M., et al., *Complement-dependent mpox-virus-neutralizing antibodies in infected and*  
533 *vaccinated individuals*. Cell Host Microbe, 2023. **31**(6): p. 937-948 e4.  
534 <https://doi.org/10.1016/j.chom.2023.05.001>
- 535 43. Mazzotta, V., et al., *Immunogenicity and reactogenicity of modified vaccinia Ankara pre-*  
536 *exposure vaccination against mpox according to previous smallpox vaccine exposure and*  
537 *HIV infection: prospective cohort study*. EClinicalMedicine, 2024. **68**: p. 102420.  
538 <https://doi.org/10.1016/j.eclinm.2023.102420>
- 539 44. Wyatt, L.S., et al., *Highly attenuated smallpox vaccine protects mice with and without immune*  
540 *deficiencies against pathogenic vaccinia virus challenge*. Proc Natl Acad Sci U S A, 2004.  
541 **101**(13): p. 4590-5. <https://doi.org/10.1073/pnas.0401165101>
- 542 45. Cohn, H., et al., *Mpox vaccine and infection-driven human immune signatures: an*  
543 *immunological analysis of an observational study*. Lancet Infect Dis, 2023. **23**(11): p. 1302-  
544 1312. [https://doi.org/10.1016/S1473-3099\(23\)00352-3](https://doi.org/10.1016/S1473-3099(23)00352-3)
- 545 46. Freyn, A.W., et al., *An mpox virus mRNA-lipid nanoparticle vaccine confers protection against*  
546 *lethal orthopoxviral challenge*. Sci Transl Med, 2023. **15**(716): p. eadg3540.  
547 <https://doi.org/10.1126/scitranslmed.adg3540>
- 548 47. Robert Koch-Institut. *Mpox Impfmonitoring Juni 2022 – Januar 2024*. 2024 [cited 2024 18  
549 Apr]; Available from:  
550 [https://www.rki.de/DE/Content/Infekt/Impfen/ImpfungenAZ/Affenpocken/Affenpocken-](https://www.rki.de/DE/Content/Infekt/Impfen/ImpfungenAZ/Affenpocken/Affenpocken-Impfmonitoring.pdf?__blob=publicationFile)  
551 [Impfmonitoring.pdf?\\_\\_blob=publicationFile](https://www.rki.de/DE/Content/Infekt/Impfen/ImpfungenAZ/Affenpocken/Affenpocken-Impfmonitoring.pdf?__blob=publicationFile).
- 552 48. van Ewijk, C.E. and Hahne, S.J., *Letter to the editor: Bias in the vaccine effectiveness*  
553 *estimates of one-dose post-exposure prophylaxis against mpox*. Euro Surveill, 2023. **28**(34).  
554 <https://doi.org/10.2807/1560-7917.ES.2023.28.34.2300358>
- 555 49. Montero Morales, L., et al., *Authors' response: Bias in the vaccine effectiveness estimates of*  
556 *one-dose post-exposure prophylaxis against mpox*. Euro Surveill, 2023. **28**(34).  
557 <https://doi.org/10.2807/1560-7917.ES.2023.28.34.2300442>

558

559 **Tables**

560 **Table 1. Characteristics of the studies included**

| Author, date<br>Country                                        | Study design<br>Period                                                   | Study population<br>Setting                                                                                                                                                                                                                                                                                                 | Sample size, n <sup>a</sup>                                                  | Vaccination<br>strategy <sup>b</sup> | VE analyses                                                                                                                                                                                                                                                                                                         |
|----------------------------------------------------------------|--------------------------------------------------------------------------|-----------------------------------------------------------------------------------------------------------------------------------------------------------------------------------------------------------------------------------------------------------------------------------------------------------------------------|------------------------------------------------------------------------------|--------------------------------------|---------------------------------------------------------------------------------------------------------------------------------------------------------------------------------------------------------------------------------------------------------------------------------------------------------------------|
| <b>Allard, 2024<br/>[27]</b><br><br><b>Canada</b>              | Retrospective<br>cohort study<br><br>19 May 2022<br>to 2023 <sup>c</sup> | Individuals with mpox<br><br>Public health surveillance from<br>Montreal Public Health;<br>supplemented with self-reported<br>sociodemographic and clinical data<br>from questionnaires; vaccination data<br>from provincial immunization registry                                                                          | 403                                                                          | PrEP ± PEP                           | VE calculated as: 1 - odds of clinical<br>outcomes among persons with mpox<br>who were vaccinated compared with<br>those who were unvaccinated <ul style="list-style-type: none"> <li>• By time after vaccination</li> <li>• By clinical manifestations<sup>d</sup></li> </ul>                                      |
| <b>Bertran, 2023<br/>[32]</b><br><br><b>United<br/>Kingdom</b> | Case-<br>coverage<br><br>04 Jul 2022 to<br>21 Dec 2022                   | Mpox cases; vaccine coverage<br>estimated in at-risk GBMSM<br>population<br><br>Cases: public health surveillance<br>data from across England, with self-<br>reported vaccination data from<br>questionnaires; coverage population<br>in England estimated by public health<br>agency (no individual patient-level<br>data) | Cases: 363<br>Population used<br>for coverage<br>estimate: 89,240            | PrEP                                 | VE calculated as: 1 - odds of<br>vaccination in cases/odds of<br>vaccination in the population <ul style="list-style-type: none"> <li>• By time after vaccination; all ages</li> <li>• By time after vaccination; cases<br/>younger than 50 years</li> </ul>                                                        |
| <b>Brousseau,<br/>2023<br/>[28]</b><br><br><b>Canada</b>       | Test-negative<br>case-control<br><br>19 Jun 2022 to<br>24 Sep 2022       | Individuals with a specimen<br>submitted for mpox testing<br><br>Public health surveillance data from<br>the province of Quebec, linked to<br>administrative data and<br>supplemented with self-reported<br>sociodemographic and exposure<br>data from questionnaires                                                       | Cases: 231<br>Controls: 301<br><br>Subset with<br>questionnaire<br>data: 199 | PrEP                                 | VE calculated as: 1 - odds of<br>vaccination in cases/odds of<br>vaccination in the population <ul style="list-style-type: none"> <li>• For entire sample</li> <li>• For subset with questionnaire<br/>data</li> <li>• For subset with questionnaire<br/>data, adjusting for questionnaire<br/>variables</li> </ul> |

|                               |                            |                                                                                                                                                                                                           |                                                             |                         |                                                                                                                                                                                                                                                                                            |
|-------------------------------|----------------------------|-----------------------------------------------------------------------------------------------------------------------------------------------------------------------------------------------------------|-------------------------------------------------------------|-------------------------|--------------------------------------------------------------------------------------------------------------------------------------------------------------------------------------------------------------------------------------------------------------------------------------------|
| <b>Charles, 2024 [33]</b>     | Case-coverage              | Confirmed positive or highly probable mpox case; vaccine coverage estimated in at-risk GBMSM population in England                                                                                        | Cases: 137<br>Population used for coverage estimate: 89,240 | PrEP                    | VE calculated as: 1 - odds of vaccination in cases/odds of vaccination in the population <ul style="list-style-type: none"> <li>By dose (one or two)</li> </ul>                                                                                                                            |
| <b>United Kingdom</b>         | 01 Jan 2023 to 31 Dec 2023 | Cases: public health surveillance data from across England; aggregate mpox vaccination data obtained from the NHS England                                                                                 |                                                             |                         |                                                                                                                                                                                                                                                                                            |
| <b>Dalton, 2023 [20]</b>      | Case-control               | Mpox cases; controls were MSM/transgender adults visiting sexual health/HIV care/HIV pre-exposure prophylaxis clinics                                                                                     | Cases: 309<br>Controls: 608                                 | PrEP ± PEP <sup>e</sup> | VE calculated as: 1 - odds of vaccination among cases/odds of vaccination among controls <ul style="list-style-type: none"> <li>By dose (one or two)</li> <li>By route of administration</li> <li>By IC status</li> </ul>                                                                  |
| <b>United States</b>          | 19 Aug 2022 to 31 Mar 2023 | Cases: Public health surveillance data from 12 US jurisdictions; controls identified from public health clinics; self-reported vaccination data from surveys verified by state registries where available |                                                             |                         |                                                                                                                                                                                                                                                                                            |
| <b>Deputy, 2023 [21]</b>      | Case-control               | Mpox cases; Controls with incident HIV infection or taking HIV pre-exposure prophylaxis                                                                                                                   | Cases: 2,193<br>Controls: 8,319                             | PrEP                    | VE calculated as: 1 - odds of vaccination among cases/odds of vaccination among controls <ul style="list-style-type: none"> <li>By dose (one or two)</li> <li>By route of administration</li> <li>Non-IC only</li> <li>Male only</li> <li>Without previous smallpox vaccination</li> </ul> |
| <b>United States</b>          | 15 Aug 2022 to 19 Nov 2022 | Inpatient and outpatient electronic health data aggregated from healthcare systems across the US; Cosmos Epic database                                                                                    |                                                             |                         |                                                                                                                                                                                                                                                                                            |
| <b>Fontán-Vela, 2023 [30]</b> | Retrospective cohort study | Men receiving HIV pre-exposure prophylaxis                                                                                                                                                                | 11,320                                                      | PrEP                    | VE calculated as: 1 - risk of infection among vaccinated group/risk of infection among unvaccinated group <ul style="list-style-type: none"> <li>By time since vaccination; all ages</li> <li>By time since vaccination; among individuals under 50 years</li> </ul>                       |
| <b>Spain</b>                  | 12 Jul 2022 to 12 Dec 2022 | Public health surveillance data from autonomous regions across Spain                                                                                                                                      |                                                             |                         |                                                                                                                                                                                                                                                                                            |



|                                                       |                                                      |                                                                                                                                                                                                                                                                             |                                                                                  |                         |                                                                                                                                                                                                                                                                                                                                                                                                  |
|-------------------------------------------------------|------------------------------------------------------|-----------------------------------------------------------------------------------------------------------------------------------------------------------------------------------------------------------------------------------------------------------------------------|----------------------------------------------------------------------------------|-------------------------|--------------------------------------------------------------------------------------------------------------------------------------------------------------------------------------------------------------------------------------------------------------------------------------------------------------------------------------------------------------------------------------------------|
| <b>Haverkate, 2023 [35]</b><br><b>The Netherlands</b> | Case-coverage<br><br>08 Aug 2022 to 04 Dec 2022      | Mpox cases; vaccine coverage calculated in population invited for vaccination (GBMSM/transgender persons using/on the waiting list for HIV pre-exposure prophylaxis or at high risk for mpox)<br><br>Public health institutions across the Netherlands                      | Cases: 162<br>Population for coverage calculation: 39,657                        | PrEP ± PEP <sup>e</sup> | VE calculated as 1 - odds of vaccination in cases/odds of vaccination in the population                                                                                                                                                                                                                                                                                                          |
| <b>Montero Morales, 2023 [31]</b><br><b>Spain</b>     | Prospective cohort<br><br>17 May 2022 to 15 Aug 2022 | Close contacts of laboratory-confirmed mpox cases<br><br>Public health institutions serving the Madrid region; confirmed by vaccination registries                                                                                                                          | 484                                                                              | PEP                     | VE calculated as 1 - hazard rate among vaccinated group/hazard rate among unvaccinated group <ul style="list-style-type: none"> <li>• By time from exposure to vaccination</li> <li>• By clinical symptoms (general symptoms<sup>f</sup> or polysymptomatic disease<sup>g</sup>)</li> <li>• By age</li> <li>• By sex</li> <li>• By contact type</li> <li>• By HIV-related information</li> </ul> |
| <b>Navarro, 2023 [29]</b><br><b>Canada</b>            | Prospective cohort<br><br>12 Jun 2022 to 26 Nov 2023 | Individuals with at least one syphilis test in the previous year, a new diagnosis of one or more bacterial STIs in the previous year or who filled a prescription for HIV pre-exposure prophylaxis in the previous year<br><br>Public health surveillance data from Ontario | 6,408 (3,204 vaccinated individuals matched with 3,204 unvaccinated individuals) | PrEP                    | VE calculated as 1 - hazard rate among vaccinated group/hazard rate among unvaccinated group <ul style="list-style-type: none"> <li>• By time after vaccination</li> </ul>                                                                                                                                                                                                                       |

|                               |                            |                                                                                                                                                                                                          |                                                                            |            |                                                                                                                                                                                                                                                              |
|-------------------------------|----------------------------|----------------------------------------------------------------------------------------------------------------------------------------------------------------------------------------------------------|----------------------------------------------------------------------------|------------|--------------------------------------------------------------------------------------------------------------------------------------------------------------------------------------------------------------------------------------------------------------|
| <b>Payne, 2022 [22]</b>       | Case-coverage              | Mpox cases; vaccine coverage estimated in MSM with HIV or eligible for HIV pre-exposure prophylaxis                                                                                                      | Cases: 9,544<br>Population used for coverage estimate: NR                  | PrEP ± PEP | Incidence rate ratio was calculated comparing that of unvaccinated individuals to vaccinated individuals with one or two doses                                                                                                                               |
| <b>United States</b>          | 31 Jul 2022 to 01 Oct 2022 | Cases: Public health surveillance data from 43 jurisdictions across the US; coverage population of MSM/HIV pre-exposure prophylaxis recipients estimated (no individual patient-level data)              |                                                                            |            |                                                                                                                                                                                                                                                              |
| <b>Ramchandani, 2023 [23]</b> | Retrospective cohort       | MSM attending sexual health clinics                                                                                                                                                                      | 204 mpox cases<br>4,230 MSM attended the clinic                            | PrEP ± PEP | VE calculated as 1 - hazard rate among vaccinated group/hazard rate among unvaccinated group <ul style="list-style-type: none"> <li>• By dose (one or two)</li> </ul>                                                                                        |
| <b>United States</b>          | 01 May 2022 to 31 Dec 2022 | Public health institutions, vaccination registries and surveillance data from Seattle and King Country, Washington                                                                                       |                                                                            |            |                                                                                                                                                                                                                                                              |
| <b>Rosen, 2024 [24]</b>       | Retrospective cohort study | Individuals exposed to persons with confirmed mpox                                                                                                                                                       | PEP <sub>L</sub> <sup>n</sup> : 594<br>PEP <sub>F</sub> <sup>n</sup> : 471 | PEP        | VE calculated as 1 - adjusted odds among vaccinated group/odds among unvaccinated group <ul style="list-style-type: none"> <li>• By time from first and last exposure to vaccination</li> <li>• By method; target trial emulation or conventional</li> </ul> |
| <b>United States</b>          | 22 May 2022 to 24 Aug 2022 | Public health surveillance data from the New York City Department of Health and Mental Hygiene                                                                                                           |                                                                            |            |                                                                                                                                                                                                                                                              |
| <b>Rosenberg, 2023 [25]</b>   | Case-control               | Mpox cases; controls were males with rectal gonorrhoea or primary syphilis diagnosed within the same time frame as the mpox cases, and with presumptive sexual contact with a male or transgender person | Cases:252<br>Controls: 255                                                 | PrEP ± PEP | VE calculated as: 1 - odds of vaccination among cases/odds of vaccination among controls <ul style="list-style-type: none"> <li>• By dose (one, two or both)</li> <li>• By time intervals after receipt of one or two doses</li> </ul>                       |
| <b>United States</b>          | 02 Jun 2022 to 31 Dec 2022 | Public health surveillance data covering New York State (excluding NYC); CDESS                                                                                                                           |                                                                            |            |                                                                                                                                                                                                                                                              |

|                                                       |                                                    |                                                                                                                                                                                                                                                                                                                                |                                                                 |            |                                                                                                                                                                                                                                                                                                                                              |
|-------------------------------------------------------|----------------------------------------------------|--------------------------------------------------------------------------------------------------------------------------------------------------------------------------------------------------------------------------------------------------------------------------------------------------------------------------------|-----------------------------------------------------------------|------------|----------------------------------------------------------------------------------------------------------------------------------------------------------------------------------------------------------------------------------------------------------------------------------------------------------------------------------------------|
| <b>Schildhauer, 2023 [26]</b><br><b>United States</b> | Retrospective cohort<br>12 May 2022 to 18 May 2023 | California residents diagnosed with mpox<br><br>Public health surveillance data covering California                                                                                                                                                                                                                            | 250 mpox-associated hospitalizations<br>4,611 persons with mpox | PrEP ± PEP | Odds of hospitalization among persons with mpox who were vaccinated compared with those who were unvaccinated were calculated <ul style="list-style-type: none"> <li>• By dose (one or two)</li> <li>• By strategy (PEP or PrEP)</li> <li>• By HIV status</li> <li>• By dose and HIV status</li> <li>• By strategy and HIV status</li> </ul> |
| <b>Wolff Sagy, 2023 [34]</b><br><b>Israel</b>         | Retrospective cohort<br>31 Jul 2022 to 25 Dec 2022 | Males aged 18–42 years who were (a) dispensed HIV pre-exposure prophylaxis at least for 1 month since 1 January 2022, or (b) diagnosed with HIV and also were diagnosed with one or more STIs since 1 January 2022<br><br>HER database from a large healthcare system operating across Israel (52% of population covered); CHS | 2,054                                                           | PrEP ± PEP | VE calculated as 1 - hazard rate among vaccinated group/hazard rate among unvaccinated group                                                                                                                                                                                                                                                 |

---

CDESS: The Communicable Disease Electronic Surveillance System; CHS: Clalit Health Services; GBMSM: gay, bisexual, and other men who have sex with men; HIV: human immunodeficiency virus; IC: immunocompromised; MSM: men who have sex with men; NHS: National Health Service; NYC: New York City; PEP: post-exposure prophylactic vaccination; PrEP: pre-exposure prophylactic vaccination; STI: sexually transmitted infection; US: United States; VE: vaccine effectiveness.

<sup>a</sup> Sample size as used in the main VE analysis; <sup>b</sup> The studies focused either on PrEP or on PEP. In the former case, studies may have inadvertently included some PEP recipients and these studies are designated as 'PrEP ± PEP'; <sup>c</sup> The mpox outbreak in Montreal, Canada, during 2022; <sup>d</sup> The number of lesions, sites affected by lesions, and other clinical manifestations (OCM); <sup>e</sup> Number of participants receiving MVA-BN as PEP limited by exclusion of those receiving the vaccine ≤13 days before their index date. VE for PEP was not estimated due to small sample sizes; <sup>f</sup> General symptoms: exanthema, lymphadenopathy, proctitis, mouth ulcers, ocular involvement, bacterial superinfection of lesions, bronchopneumonia, and general symptoms such as fever, asthenia, odynophagia, muscle pain, headache, other); <sup>g</sup> Polysymptomatic disease: Four or more symptoms described in 'general symptoms'. <sup>h</sup> Analyses of VE were conducted separately for MVA-BN vaccine administered as PEP ≤14 days after the last exposure (PEP<sub>L</sub>) and for PEP administered ≤14 days after the first exposure (PEP<sub>F</sub>).

562 **Table 2. Vaccine effectiveness estimates against symptomatic mpox disease ≥14 days after vaccination for MVA-BN administered**  
 563 **exclusively or primarily as pre-exposure prophylactic vaccination**

| Author, date<br>Study design                              | Study population                                                   | Sample size, n                                              | Crude VE<br>(95% CI) |                             | Adjusted VE<br>(95% CI) |           | Statistical methods                                                                                                                                                                                                                                                                                                                                 |
|-----------------------------------------------------------|--------------------------------------------------------------------|-------------------------------------------------------------|----------------------|-----------------------------|-------------------------|-----------|-----------------------------------------------------------------------------------------------------------------------------------------------------------------------------------------------------------------------------------------------------------------------------------------------------------------------------------------------------|
|                                                           |                                                                    |                                                             | One<br>dose          | Two<br>doses                | One dose                | Two doses |                                                                                                                                                                                                                                                                                                                                                     |
| <b>PrEP</b>                                               |                                                                    |                                                             |                      |                             |                         |           |                                                                                                                                                                                                                                                                                                                                                     |
| Bertran, 2023<br>[32]<br><br>Case-coverage                | Mpox cases; vaccine coverage estimated in at-risk GBMSM population | Cases: 330<br>Population used for coverage estimate: 89,240 | 78%<br>(54–89)       | NR                          | NR                      | NR        | Basic rate comparison without adjustment                                                                                                                                                                                                                                                                                                            |
| Brousseau, 2023<br>[28]<br><br>Test-negative case-control | Individuals with a specimen submitted for mpox testing             | Cases: 231<br>Controls: 301                                 | 33%<br>(2–54)        | NR                          | 35%<br>(-2–59)          | NR        | Logistic regression<br><br>Adjustment for age, calendar time, STI tests and diagnosis, HIV status                                                                                                                                                                                                                                                   |
|                                                           | Subset with questionnaire data                                     | Cases: 91<br>Controls: 108                                  | 38%<br>(-9–65)       | NR                          | 30%<br>(-38–64)         | NR        | Logistic regression<br><br>Adjustment for age, calendar time, STI tests and diagnosis, HIV status                                                                                                                                                                                                                                                   |
|                                                           |                                                                    |                                                             | NR                   | NR                          | 65%<br>(1–87)           | NR        | As above, additionally adjusted for ethnocultural background, immunosuppression, HIV status/pre-exposure prophylaxis use, contact with a person who has mpox symptoms, number of sexual partners, drug use before or during sexual activity, sex involving >2 people, attending sex-on-premise venues, skin-to-skin contacts during a festive event |
| Charles, 2024<br>[33]                                     | Confirmed positive or highly probable mpox case; vaccine           | Cases: 126<br>Population used for coverage                  | 84%<br>(74–91)       | 80%<br>(69–83) <sup>a</sup> | NR                      | NR        | Basic rate comparison without adjustment                                                                                                                                                                                                                                                                                                            |

|                               |                                                                                                                                                                                                                         |                                                     |                 |                |                |                |                                                                                                                                                                                                               |
|-------------------------------|-------------------------------------------------------------------------------------------------------------------------------------------------------------------------------------------------------------------------|-----------------------------------------------------|-----------------|----------------|----------------|----------------|---------------------------------------------------------------------------------------------------------------------------------------------------------------------------------------------------------------|
| Case-coverage                 | coverage estimated in at-risk GBMSM population in England                                                                                                                                                               | estimate:<br>89,240                                 |                 |                |                |                |                                                                                                                                                                                                               |
| Deputy, 2023 [21]             | Mpox cases; Controls with incident HIV infection or taking HIV pre-exposure prophylaxis                                                                                                                                 | <u>One dose</u><br>Cases: 2,168<br>Controls: 7,984  | 52%<br>(42–60)  | 77%<br>(65–85) | 36%<br>(22–47) | 66%<br>(47–78) | Conditional logistic regression                                                                                                                                                                               |
| Case-control                  |                                                                                                                                                                                                                         | <u>Two doses</u><br>Cases: 2,047<br>Controls: 7,319 |                 |                |                |                | Adjustment for age, race or ethnic group, SVI score, and the presence or absence of IC conditions                                                                                                             |
| Fontán-Vela, 2023 [30]        | Men receiving HIV pre-exposure prophylaxis                                                                                                                                                                              | Exposed: 5,560<br>Unexposed: 5,560                  | 79%<br>(33–100) | NR             | NR             | NR             | Basic rate comparison without adjustment                                                                                                                                                                      |
| Retrospective cohort          |                                                                                                                                                                                                                         |                                                     |                 |                |                |                |                                                                                                                                                                                                               |
| Navarro, 2023 [29]            | Individuals with at least one syphilis test in the previous year, a new diagnosis of one or more bacterial STIs in the previous year or who filled a prescription for HIV pre-exposure prophylaxis in the previous year | Exposed: 3,204<br>Unexposed: 3,204                  | NR              | NR             | 59%<br>(31–76) | NR             | Cox proportional hazards model                                                                                                                                                                                |
| Prospective cohort            |                                                                                                                                                                                                                         |                                                     |                 |                |                |                | Adjustment for age, geographic region, proxies for sexual exposures (number of bacterial STIs in the previous three years, HIV status), and history of receipt of any non-MVA-BN vaccine in the previous year |
| <b>PrEP ± PEP<sup>b</sup></b> |                                                                                                                                                                                                                         |                                                     |                 |                |                |                |                                                                                                                                                                                                               |
| Dalton, 2023 [20]             | Mpox cases; controls were MSM/transgender adults visiting sexual health/HIV care/HIV pre-exposure prophylaxis clinics                                                                                                   | <u>One dose:</u><br>Cases: 281<br>Controls: 430     | 76%<br>(65–83)  | 87%<br>(79–93) | 75%<br>(61–84) | 86%<br>(74–92) | Conditional logistic regression                                                                                                                                                                               |
| Case-control                  |                                                                                                                                                                                                                         | <u>Two doses:</u><br>Cases: 251<br>Controls: 371    |                 |                |                |                | Adjustment for age, race, and ethnicity; immunocompromising conditions; and close contact with a person with known mpox                                                                                       |
| Haverkate, 2023               | Mpox cases; vaccine coverage calculated                                                                                                                                                                                 | Cases: 162<br>Population for                        | NR              | 68%<br>(4–90)  | NR             | NR             | A logistic regression model + with the logit of the proportion of the                                                                                                                                         |

|                                                |                                                                                                                                                                                                         |                                                                                                                                                                  |                |                 |                             |                             |                                                                                                                                                                                                                                                            |
|------------------------------------------------|---------------------------------------------------------------------------------------------------------------------------------------------------------------------------------------------------------|------------------------------------------------------------------------------------------------------------------------------------------------------------------|----------------|-----------------|-----------------------------|-----------------------------|------------------------------------------------------------------------------------------------------------------------------------------------------------------------------------------------------------------------------------------------------------|
| [35]<br>Case-coverage                          | in population invited for vaccination (GBMSM/transgender persons using/on the waiting list for HIV pre-exposure prophylaxis or at high risk for mpox)                                                   | coverage calculation:<br>39,657                                                                                                                                  |                |                 |                             |                             | population vaccinated as an offset                                                                                                                                                                                                                         |
| Payne, 2022 [22]<br>Case-coverage              | Mpox cases; vaccine coverage estimated in MSM with HIV or eligible for HIV pre-exposure prophylaxis                                                                                                     | <u>One dose:</u><br>Cases: 8,712<br>Population used for coverage estimate: NR<br><br><u>Two doses:</u><br>Cases: 48<br>Population used for coverage estimate: NR | NR             | NR              | 86%<br>(83–89) <sup>c</sup> | 90%<br>(86–92) <sup>c</sup> | IRR: negative binomial regression, controlling for week                                                                                                                                                                                                    |
| Ramchandani, 2023 [23]<br>Retrospective cohort | MSM attending sexual health clinics                                                                                                                                                                     | Exposed: 1837<br>Nonexposed: 2,393                                                                                                                               | 60%<br>(24–79) | 57%<br>(-84–90) | 81%<br>(64–90)              | 83%<br>(28–96)              | Cox proportional hazards model<br><br>Adjustment for age, race/ethnicity, HIV status, year of last SHC visit, methamphetamine use in the last year, gonorrhea or syphilis diagnosis in the last year, and self-report of >10 sex partners in the last year |
| Rosenberg, 2023 [25]<br>Case-control           | Mpox cases; controls were males with rectal gonorrhea or primary syphilis diagnosed within the same time frame as the mpox cases, and with presumptive sexual contact with a male or transgender person | <u>One dose:</u><br>Cases: 240<br>Controls: 227<br><br><u>Two doses:</u><br>Cases: 232<br>Controls: 223                                                          | NR             | NR              | 68%<br>(25–87)              | 89%<br>(44–98) <sup>d</sup> | Conditional logistic regression<br><br>Adjustment for age, race, and ethnicity; and region within New York outside NYC                                                                                                                                     |

|                       |                                                                                |                                    |    |    |                          |    |                                                                                                                                                                                                                                                                                                     |
|-----------------------|--------------------------------------------------------------------------------|------------------------------------|----|----|--------------------------|----|-----------------------------------------------------------------------------------------------------------------------------------------------------------------------------------------------------------------------------------------------------------------------------------------------------|
| Wolff Sagy, 2023 [34] | Individuals considered at high risk for infection and eligible for the vaccine | Exposed: 1,037<br>Unexposed: 1,017 | NR | NR | 86% (59–95) <sup>e</sup> | NR | Multivariate cox proportional hazards regression<br><br>Adjustment for age, sex, sector, sociodemographic status, MVA-BN vaccine uptake, Tel Aviv District, HIV pre-exposure prophylaxis use, purchase of PDE5 inhibitors, HIV history, STI (chlamydia or gonorrhea, recent chlamydia or gonorrhea) |
|-----------------------|--------------------------------------------------------------------------------|------------------------------------|----|----|--------------------------|----|-----------------------------------------------------------------------------------------------------------------------------------------------------------------------------------------------------------------------------------------------------------------------------------------------------|

CI: confidence interval; GBMSM: gay, bisexual, and other men who have sex with men; HIV: human immunodeficiency virus; IC: immunocompromised;

MSM: men who have sex with men; NR: not reported; NYC: New York City; PDE5: phosphodiesterase 5; SHC: sexual health clinic; STI: sexually transmitted infection; SVI: social vulnerability index; VE: vaccine effectiveness.

<sup>a</sup> Includes one individual who reported having received three doses; <sup>b</sup> Studies that focused on PrEP but may have inadvertently included some PEP recipients; <sup>c</sup> Calculated by the authors of this systematic literature review; <sup>d</sup> ≥0 days after the second dose; <sup>e</sup> Also includes cases <14 days after vaccination.



565 **Table 3. Vaccine effectiveness estimates against symptomatic mpox disease ≥14 days after second dose for MVA-BN administered as**  
 566 **post-exposure prophylactic vaccination**

| Author, date<br>Study design                                                              | Study population                                                     | Sample size, n                                                                                                                         | Crude VE %<br>(95% CI) |           | Adjusted VE<br>(95% CI)                                                                                                                                                                          |           | Statistical methods                                                                                                                                                                                                                                                                                                  |
|-------------------------------------------------------------------------------------------|----------------------------------------------------------------------|----------------------------------------------------------------------------------------------------------------------------------------|------------------------|-----------|--------------------------------------------------------------------------------------------------------------------------------------------------------------------------------------------------|-----------|----------------------------------------------------------------------------------------------------------------------------------------------------------------------------------------------------------------------------------------------------------------------------------------------------------------------|
|                                                                                           |                                                                      |                                                                                                                                        | One dose               | Two doses | One dose                                                                                                                                                                                         | Two doses |                                                                                                                                                                                                                                                                                                                      |
| Montero<br>Morales, 2023<br>[31]<br><br>Prospective<br>cohort study                       | Close contacts of<br>laboratory-<br>confirmed mpox<br>cases          | Exposed: 230<br>Unexposed: 254                                                                                                         | 84%<br>(66–92)         | NR        | 89%<br>(76–95) <sup>a</sup>                                                                                                                                                                      | NR        | Survival analysis<br><br>Adjustment for age, sex, type of close<br>contact, HIV pre-exposure<br>prophylaxis user, HIV infection, and<br>symptoms                                                                                                                                                                     |
| Rosen, 2024<br>[24]<br><br>Retrospective<br>cohort study –<br>with target trial<br>design | Individuals having<br>contact with<br>persons with<br>confirmed mpox | PEP <sub>L</sub> <sup>b</sup><br>Exposed: 333<br>Unexposed: 261<br><br>PEP <sub>F</sub> <sup>b</sup><br>Exposed: 183<br>Unexposed: 288 | NR                     | NR        | Conventional:<br>PEP <sub>L</sub> : 78%<br>(50–91)<br><br>PEP <sub>F</sub> : 73%<br>(31–91)<br><br>Target trial<br>PEP <sub>L</sub> : 19%<br>(-54–57)<br><br>PEP <sub>F</sub> : -7%<br>(-144–53) | NR        | Conventional: multivariate logistic<br>regression, controlling for exposure<br>risk and race/ethnicity<br><br>Target trial emulation: sequence of<br>nested trials starting each day after<br>exposure to account for immortal time<br>bias. Logistic regression controlling<br>for exposure risk and race/ethnicity |

CI: confidence interval; HIV: human immunodeficiency virus; NR: not reported; PEP: post-exposure prophylaxis; VE: vaccine effectiveness.

<sup>a</sup> Also includes cases <14 days after vaccination; <sup>b</sup> Analyses of VE were conducted separately for MVA-BN vaccine administered as PEP ≤14 days after the last exposure (PEP<sub>L</sub>) and for PEP administered ≤14 days after the first exposure (PEP<sub>F</sub>).

567

568 **Table 4. Vaccine effectiveness estimates against hospitalizations and mpox clinical manifestations**

| Author, date<br>Study design                                  | Study population                                                                             | Sample size, n                   | Crude VE<br>(95% CI)     | Adjusted VE<br>(95% CI) | Statistical methods                                                                                                                   |
|---------------------------------------------------------------|----------------------------------------------------------------------------------------------|----------------------------------|--------------------------|-------------------------|---------------------------------------------------------------------------------------------------------------------------------------|
| <b>Hospitalizations</b>                                       |                                                                                              |                                  |                          |                         |                                                                                                                                       |
| Schildhauer, 2023<br>[26]<br><br>Retrospective<br>cohort      | <b>One dose of MVA-BN, ≥14 days after vaccination</b>                                        |                                  |                          |                         | Binomial logistic regression                                                                                                          |
|                                                               | California residents<br>diagnosed with<br>mpox                                               | Exposed: 230<br>Unexposed: 3,845 | 73% (35–92) <sup>a</sup> | NR                      |                                                                                                                                       |
|                                                               | <b>Two doses of MVA-BN, ≥14 days after 2nd dose</b>                                          |                                  |                          |                         |                                                                                                                                       |
|                                                               | California residents<br>diagnosed with<br>mpox                                               | Exposed: 79<br>Unexposed: 3,845  | 80% (10–99) <sup>a</sup> | NR                      |                                                                                                                                       |
|                                                               | <b>One dose of MVA-BN after a known or suspected exposure, &lt;14 days after vaccination</b> |                                  |                          |                         |                                                                                                                                       |
|                                                               | California residents<br>diagnosed with<br>mpox                                               | Exposed: 457<br>Unexposed: 3,845 | 58% (28–78) <sup>a</sup> | NR                      |                                                                                                                                       |
| <b>Clinical manifestations</b>                                |                                                                                              |                                  |                          |                         |                                                                                                                                       |
| Allard, 2024<br>[27]<br><br>Retrospective<br>cohort           | <b>Numbers of skin lesions at day 1 (one dose)<sup>b</sup></b>                               |                                  |                          |                         | Multivariate logistic regression<br><br>Adjustment for each other<br>clinical manifestation and age                                   |
|                                                               | Individuals with<br>mpox                                                                     | Exposed: 59<br>Unexposed: 344    | NR                       | 60% (21–80)             |                                                                                                                                       |
|                                                               | <b>Body sites affected at day 1 (one dose)<sup>b</sup></b>                                   |                                  |                          |                         |                                                                                                                                       |
|                                                               | Individuals with<br>mpox                                                                     | Exposed: 59<br>Unexposed: 344    | NR                       | 76% (54–87)             |                                                                                                                                       |
|                                                               | <b>OCM<sup>c</sup> (one dose)<sup>b</sup></b>                                                |                                  |                          |                         |                                                                                                                                       |
|                                                               | Individuals with<br>mpox                                                                     | Exposed: 59<br>Unexposed: 344    | NR                       | 59% (26–77)             |                                                                                                                                       |
| Montero Morales,<br>2023<br>[31]<br><br>Prospective<br>cohort | <b>General symptoms<sup>d</sup> (one dose PEP)</b>                                           |                                  |                          |                         | Survival analysis<br><br>Adjustment for age, sex, type of<br>close contact, HIV pre-exposure<br>prophylaxis user and HIV<br>infection |
|                                                               | Close contacts of<br>laboratory-<br>confirmed mpox<br>cases                                  | Exposed: 230<br>Unexposed: 254   | 68.8%<br>(-1.5–90.4)     | 71.6%<br>(18.1–90.2)    |                                                                                                                                       |
|                                                               | <b>Polysymptomatic disease<sup>e</sup> (one dose PEP)</b>                                    |                                  |                          |                         |                                                                                                                                       |
|                                                               | Close contacts of<br>laboratory-<br>confirmed mpox<br>cases                                  | Exposed: 230<br>Unexposed: 254   | 87.5%<br>(6.2–98.3)      | 85.5%<br>(26.7–91.1)    |                                                                                                                                       |

---

CI: confidence interval; HIV: human immunodeficiency virus; NR: not reported; PEP: post-exposure prophylactic vaccination; VE: vaccine effectiveness.

<sup>a</sup> Calculated by the authors of this systematic literature review; <sup>b</sup> Vaccine administered  $\geq 14$  days before the onset of symptoms; <sup>c</sup> Other clinical manifestations (OCM): fever, adenopathy, fatigue, muscle pains, headaches, backaches, sweating, rectal pain, nausea and vomiting, sore throat etc. <sup>d</sup> General symptoms: fever, asthenia, odynophagia, muscle pain, headache, other; <sup>e</sup> Polysymptomatic disease: four or more symptoms described in 'general symptoms'.

569

570 **Figure captions**

571 **Figure 1. PRISMA flowchart**

572 DE: data extraction; FT: full-text review

### Identification of studies via databases and registers

### Identification of studies via other methods

Identification

Records identified from (n=1,173)

- PubMed (n=546)
- Embase (n=614)
- LILACS (n=13)

Records removed *before screening*:

- Duplicate records removed (n=269)

Records identified from (n=9)

- Grey literature search (n=5)
- Other sources (n=4)
  - Citation searching (n=1)
  - Provided by experts (n=3)

Screening

Records screened (n=904)

Records excluded (n=798)

Reports sought for retrieval (n=106)

Reports not retrieved (n=0)

Reports sought for retrieval (n=9)

- Grey literature search (n=5)
- Other sources (n=4)

Reports not retrieved (n=0)

Included

Reports assessed for eligibility (n=106)

Reports excluded during FT (n=97)

- Study design/publication type not of interest (n=47)
- No data on the outcome of interest (n=31)
- Duplicate (n=12)
- Language out of scope (n=3)
- Topic out of scope (n=3)
- Withdrawn (n=1)

Reports assessed for eligibility (n=9)

Reports excluded during DE (n=1)

- Overlap with more recent publication (n=1)

Studies included in review (n=16)

- From peer-reviewed sources (n=8)
- From other sources (n=8)

Reports excluded during DE (n=1)

- Overlap with more recent publication (n=1)

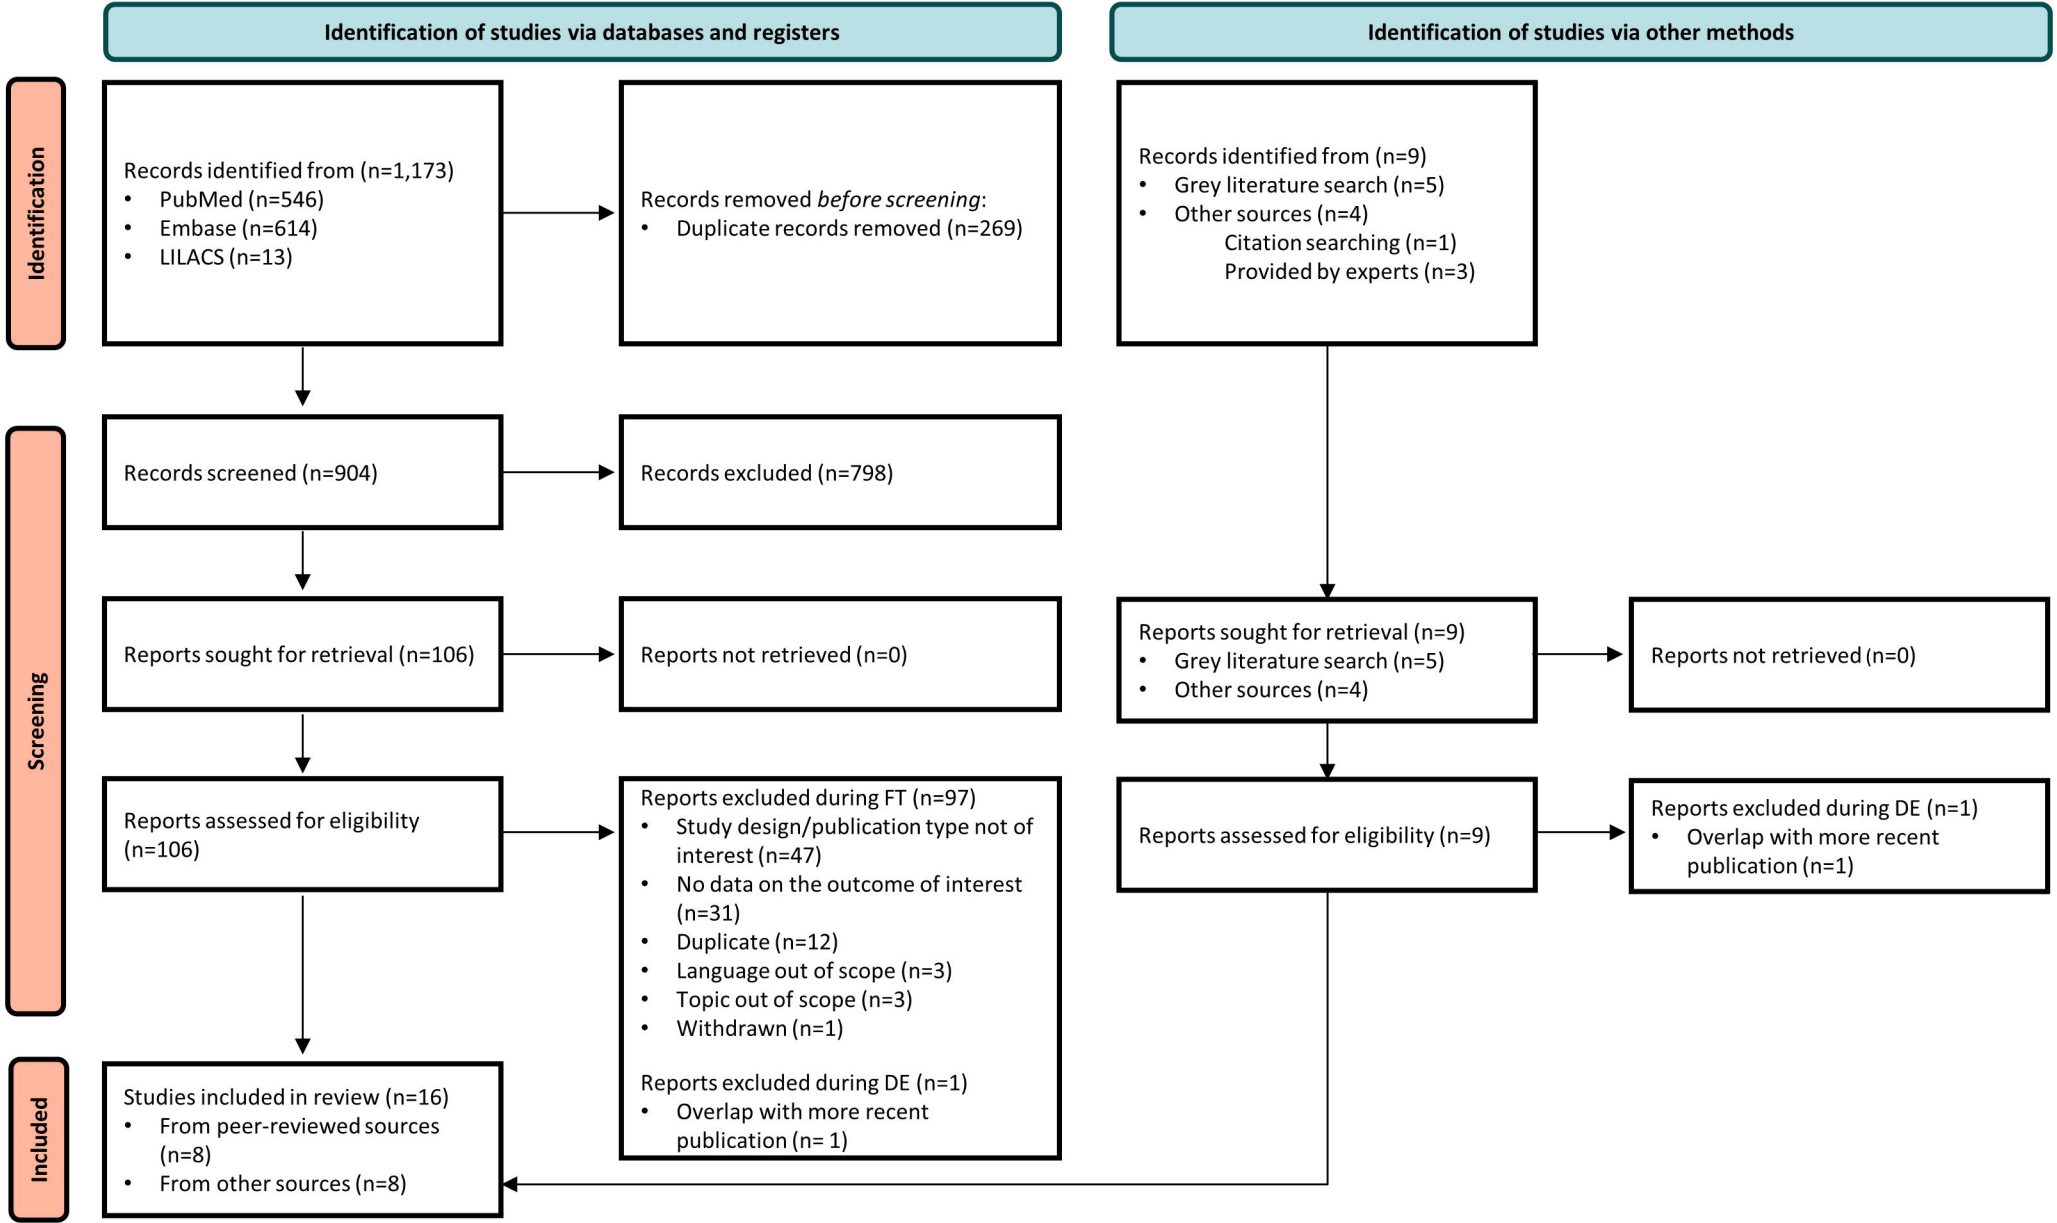

Source: https://www.medrxiv.org/content/10.1101/2024.04.25.24306078v1.full.pdf
